# Supplementary material for: Chemoradiotherapy in combination with radical surgery is associated with better outcome in cervical cancer patients
Source: PubMed Central journal article supplement (PMC5788687; doi:10.18632/oncotarget.23165), 2017-12-08
Supplement: oncotarget-09-2866-s001.pdf [file oncotarget-09-2866-s001.pdf]

## Chemoradiotherapy in combination with radical surgery is associated with better outcome in cervical cancer patients

### SUPPLEMENTARY MATERIALS

**Supplementary Table 1: LRR in patients with different risk factors**

| Risk factors               | Surgery (%) |      | Non-surgery (%) |      | P value |
|----------------------------|-------------|------|-----------------|------|---------|
|                            | 3-yr        | 5-yr | 3-yr            | 5-yr |         |
| Parametrial invasion       | 15.0        | 17.2 | 25.2            | 31.2 | 0.08    |
| Pelvic lymph node positive | 12.9        | 12.9 | 34.5            | 40.5 | 0.02    |
| Tumor diameter > 4 cm      | 13.8        | 16.4 | 27.8            | 38.1 | 0.04    |
| Residual disease           | 14.0        | 14.0 | 27.0            | 29.7 | 0.03    |

Yr, year.

**Supplementary Table 2: Cox proportional hazard tests**

| Risk factors         | Multivariate analysis |         | Univariate analysis |         |
|----------------------|-----------------------|---------|---------------------|---------|
|                      | RR                    | P value | RR                  | P value |
| FIGO stage           | 1.33                  | 0.03    | 1.41                | 0.008   |
| Chemotherapy cycles  | 0.47                  | 0.001   | 0.48                | 0.001   |
| Parametrial invasion | 2.03                  | 0.04    | 2.08                | 0.02    |
| Tumor diameter       | 2.35                  | 0.01    | 2.03                | 0.03    |

Abbreviations: RR: risk ratio.

**Supplementary Table 3: Tumor response after CCRT**

| Effect   | Surgery group<br>(N = 151) | Non-surgery group<br>(N = 163) | P <sup>#</sup> |
|----------|----------------------------|--------------------------------|----------------|
| CR (N,%) | 83, 50.9%                  | 68, 45%                        | 0.12           |
| PR (N,%) | 67, 41.1%                  | 61, 40.4%                      |                |
| SD (N,%) | 12, 7.4%                   | 9, 6.0%                        |                |
| PD (N,%) | 1, 0.6%                    | 13, 8.6%                       |                |

<sup>#</sup> Mann-Whitney test.
